# Supplementary material for: Glass-Forming Tendency of Molecular Liquids and the Strength of the Intermolecular Attractions
Source: PubMed Central journal article supplement (PMC5121653; doi:10.1038/srep36934), 2016-11-24
Supplement: srep36934-s1.pdf [file srep36934-s1.pdf]

## Supplementary Materials

### Glass-Forming Tendency of Molecular Liquids and the Strength of the Intermolecular Attractions

Kajetan Koperwas<sup>1,2</sup>, Karolina Adrjanowicz<sup>1,2\*</sup>, Zaneta Wojnarowska<sup>1,2</sup>, Agnieszka

Jedrzejowska<sup>1,2</sup>, Justyna Knapik<sup>1,2</sup> & Marian Paluch<sup>1,2</sup>

<sup>1</sup> *Institute of Physics, University of Silesia, ulica Uniwersytecka 4, 40-007 Katowice, Poland*

<sup>2</sup> *Silesian Center for Education and Interdisciplinary Research, ulica 75 Pułku Piechoty 1a, 41-500 Chorzow, Poland*

#### Supplementary Figures

(a)

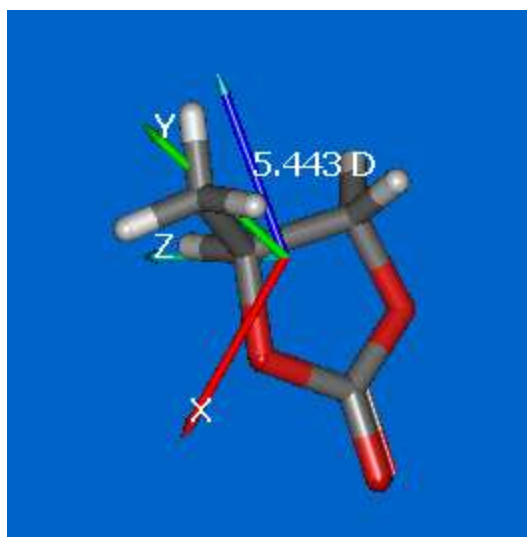

(b)

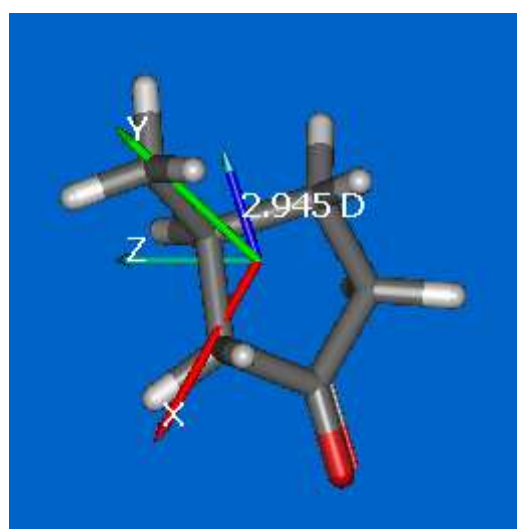

**Supplementary Figure 1. Orientation of the dipole moment.** Optimized geometry of (a) PC and (b) 3-methyl-cyclopentanone. Blue arrows indicate orientation of dipole moment with respect to principal inertial axes.

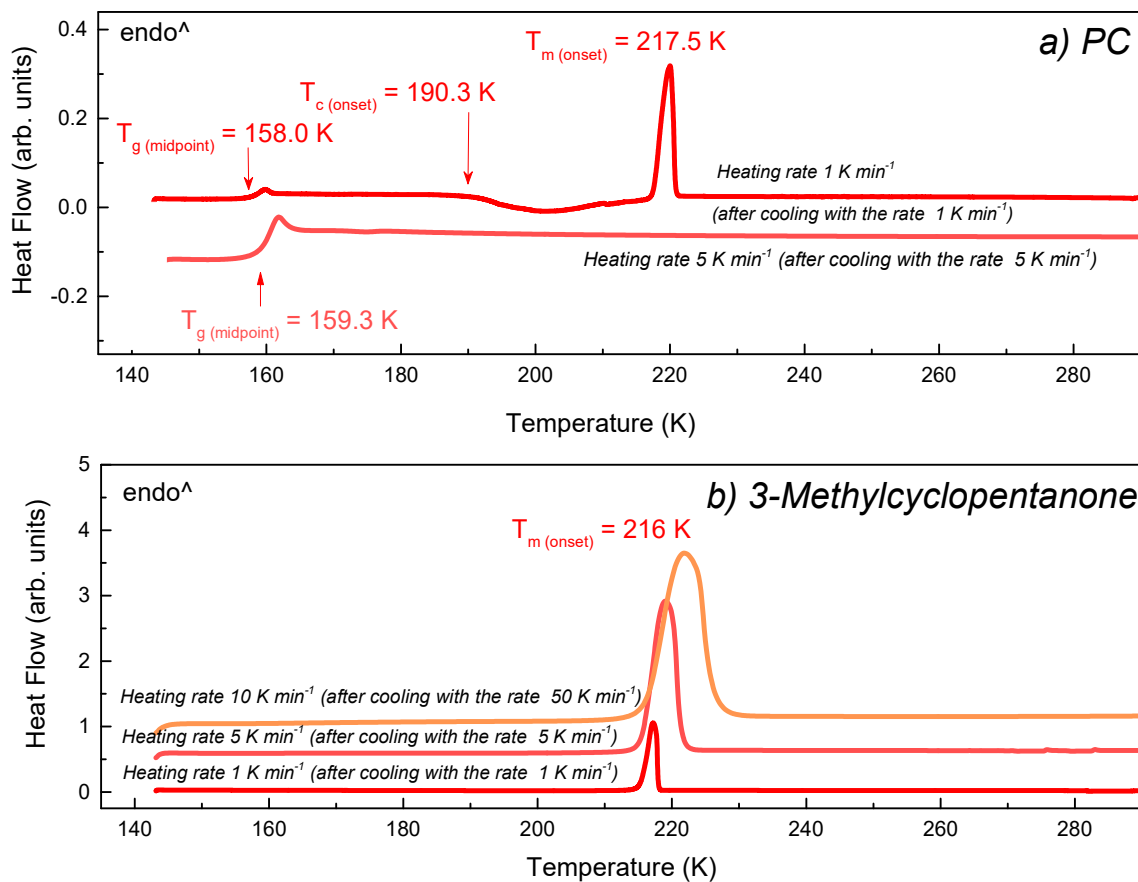

**Supplementary Figure 2. Results of the calorimetric measurements.** DSC thermograms for (a) PC and (b) 3-Methylcyclopentanone recorded on heating with different rates. No glass transition event was detected in DSC of 3-methylcyclopentanone.

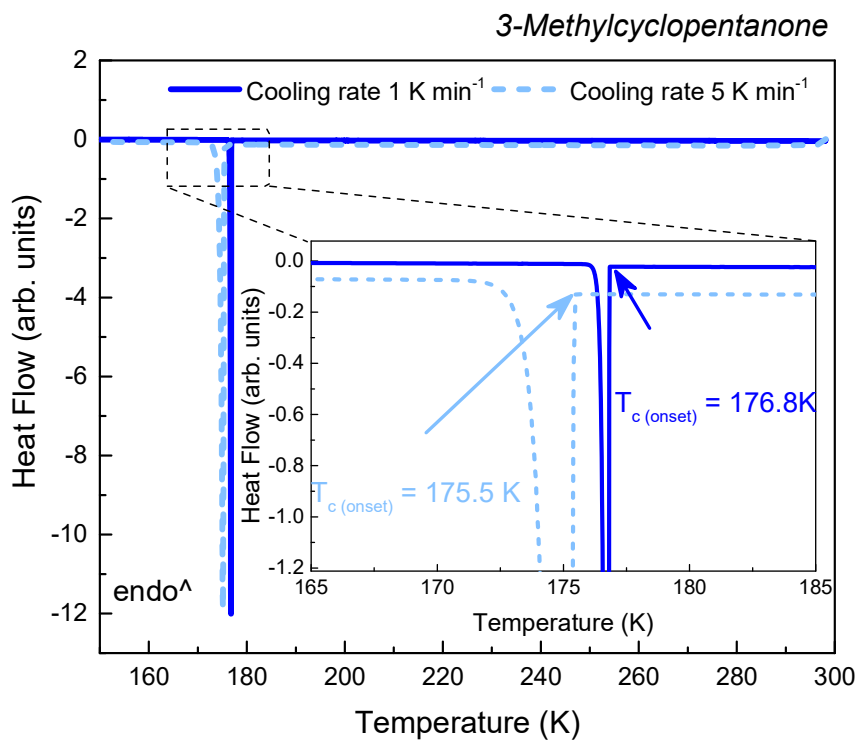

**Supplementary Figure 3. Results of the calorimetric measurements.** DSC thermograms recorded for 3-Methylcyclopentanone on cooling with different rates.

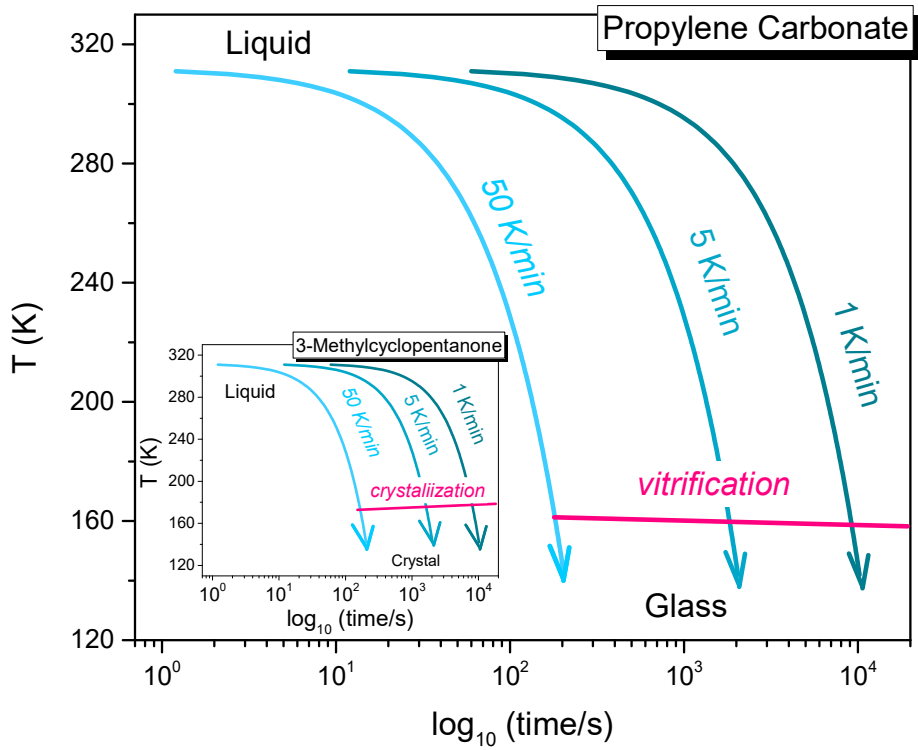

**Supplementary Figure 4.** CCT curve for PC and 3-methylcyclopentanone (inset).

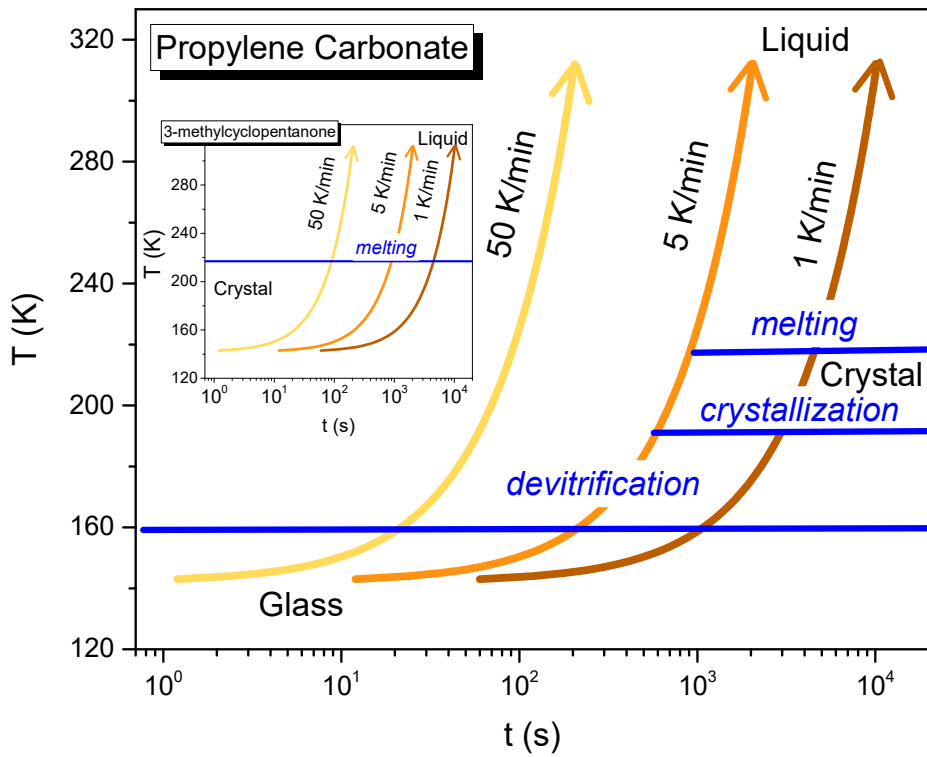

Supplementary Figure 5. CHT curve for PC and 3-methylcyclopentanone (inset).

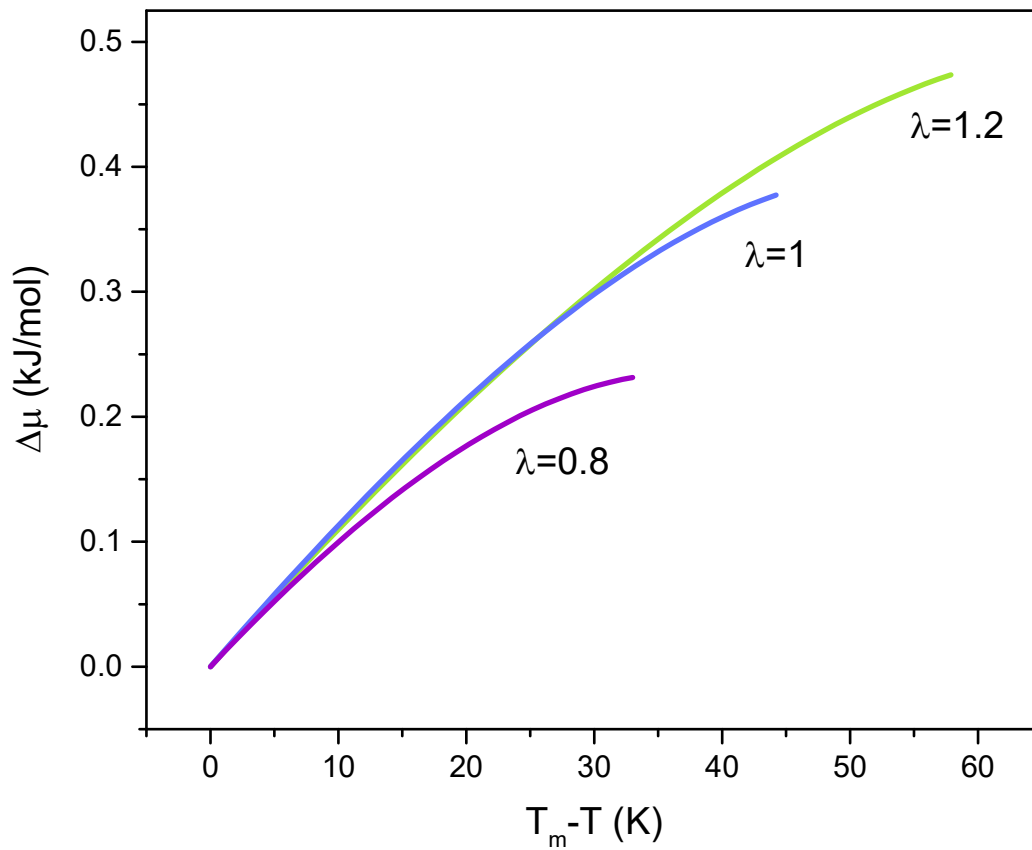

**Supplementary Figure 6. Temperature evolution of the thermodynamic driving force towards crystallization.** Possible temperature behavior of  $\Delta\mu$  for LJ system with varying strength of the intermolecular attractive forces, predicted using Eq. 3.

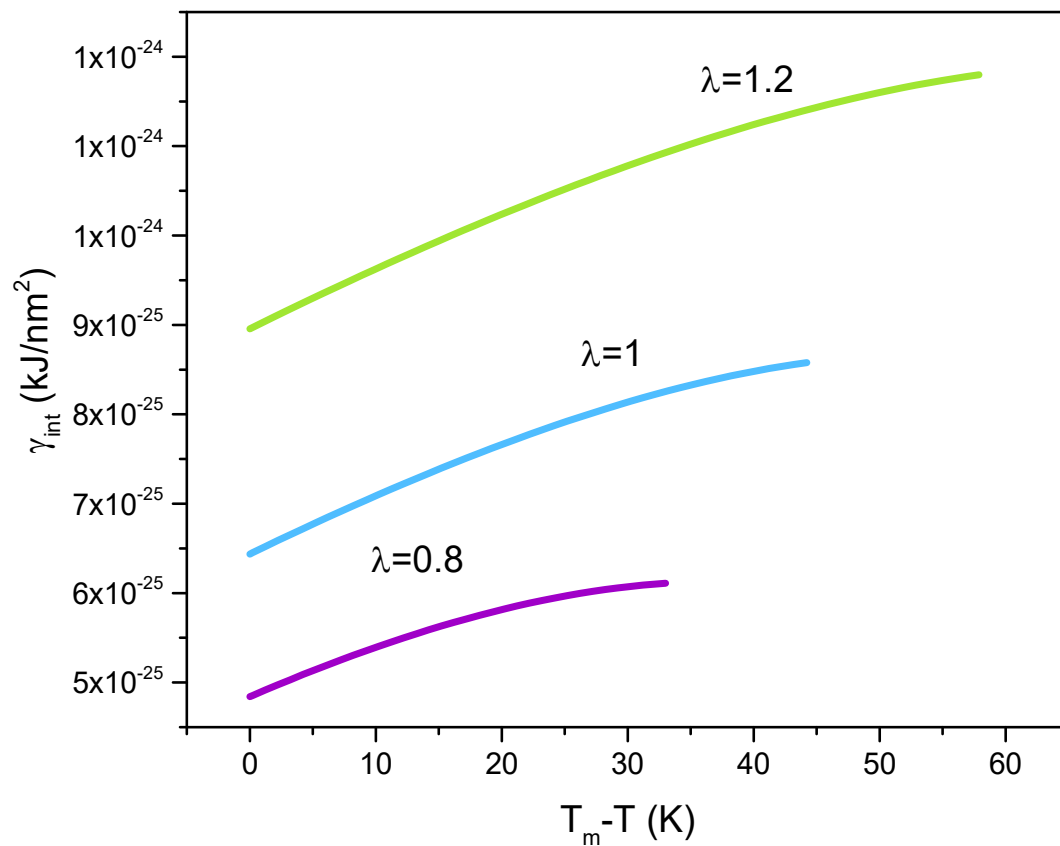

**Supplementary Figure 7. Temperature evolution of the specific surface energy.** Possible temperature behavior of  $\gamma_{\text{int}}$  for LJ system with varying strength of the intermolecular attractive forces, predicted using Eq. 4.
